# Supplementary material for: Cellular metabolism constrains innate immune responses in early human ontogeny
Source: PubMed Central journal article supplement (PMC6240060; doi:10.1038/s41467-018-07215-9), 2018-11-16
Supplement: 41467_2018_7215_MOESM1_ESM.pdf [file 41467_2018_7215_MOESM1_ESM.pdf]

**SUPPLEMENTARY FIGURES**

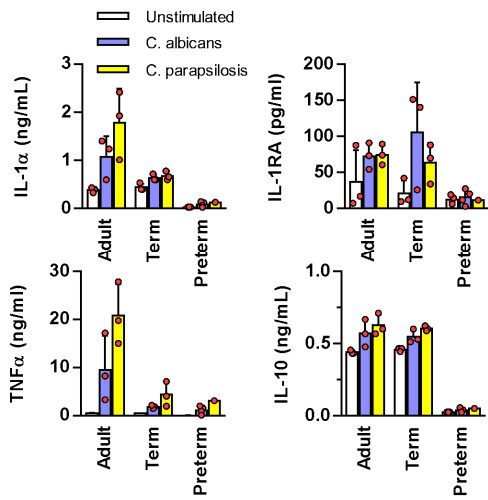

**Supplementary Figure 1: Age-related cytokine response to *Candida species*.** 24h stimulation of blood mononuclear cells using *Candida albicans* or *parapsilosis* (3 to 4 subjects/age group; preterm samples ranging from 26 to 33 weeks gestation; mean  $\pm$  SD).

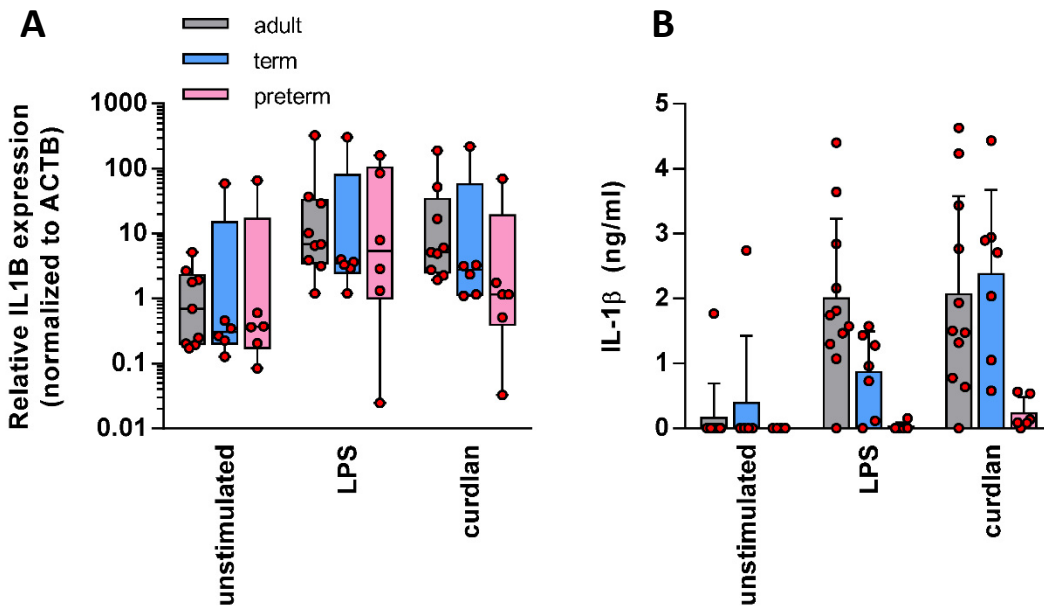

**Supplementary Figure 2: Age-related IL-1 $\beta$  transcript (A) and protein (B) expression in response to immune stimulation.** Data from 6 to 11 subjects per age group; left panel: box and whiskers; right panel: bars = mean  $\pm$  SD.

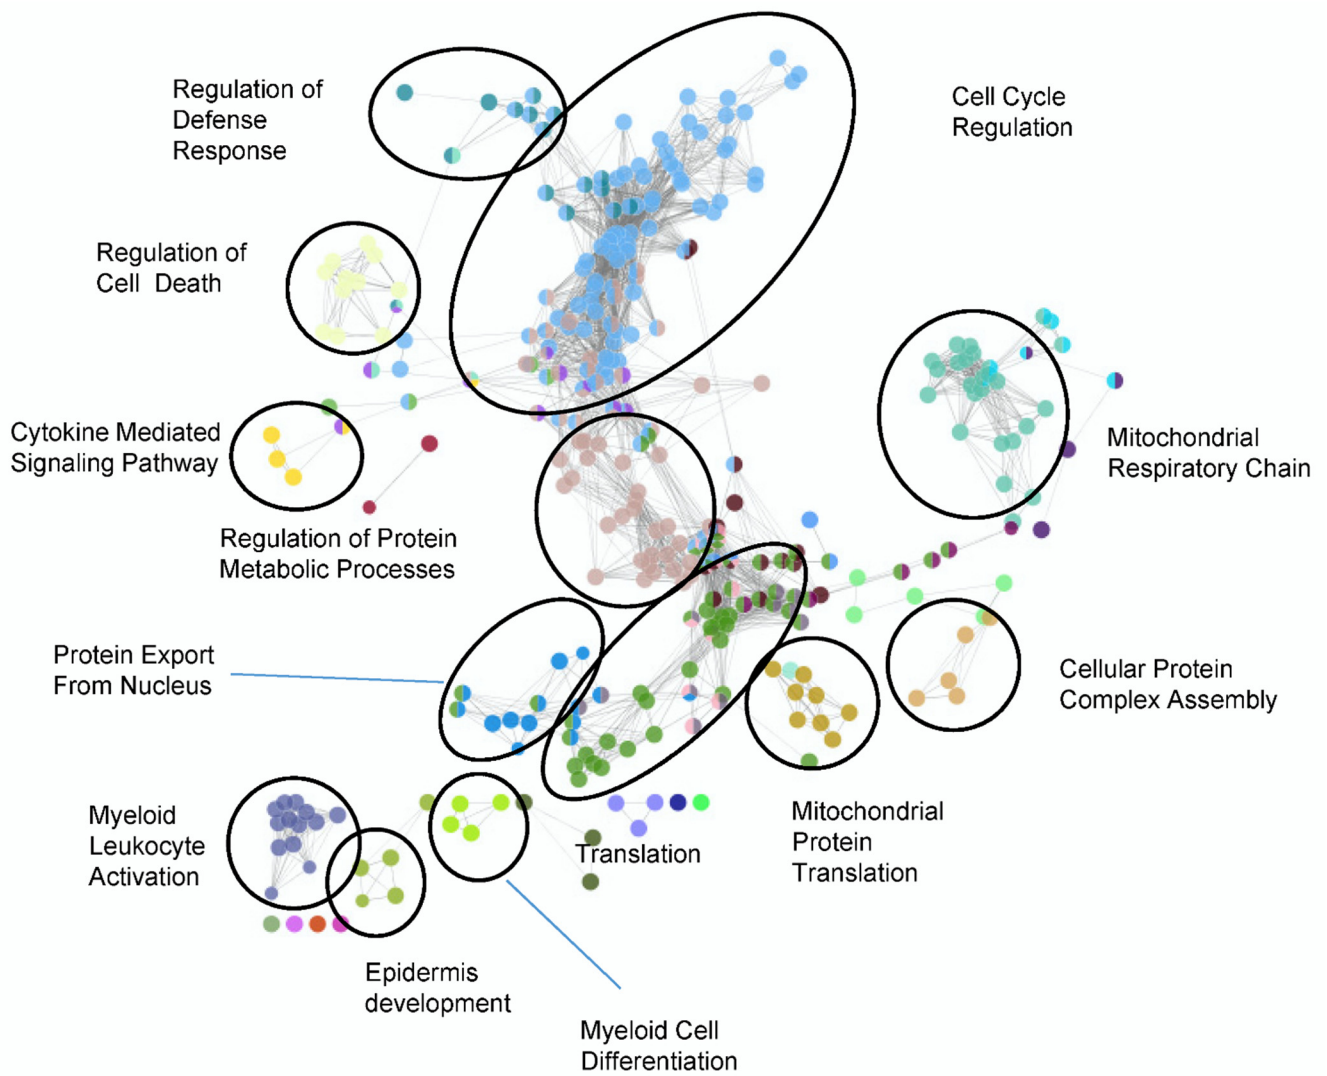

**Supplementary Figure 3: Gene-set enrichment analysis of clusters (colors, with pathway names) of differentially expressed genes (FDR<0.01) across age groups (unstimulated preterm, term and adult monocytes; data from same samples as in figure 3, 4A-C and 7H).**

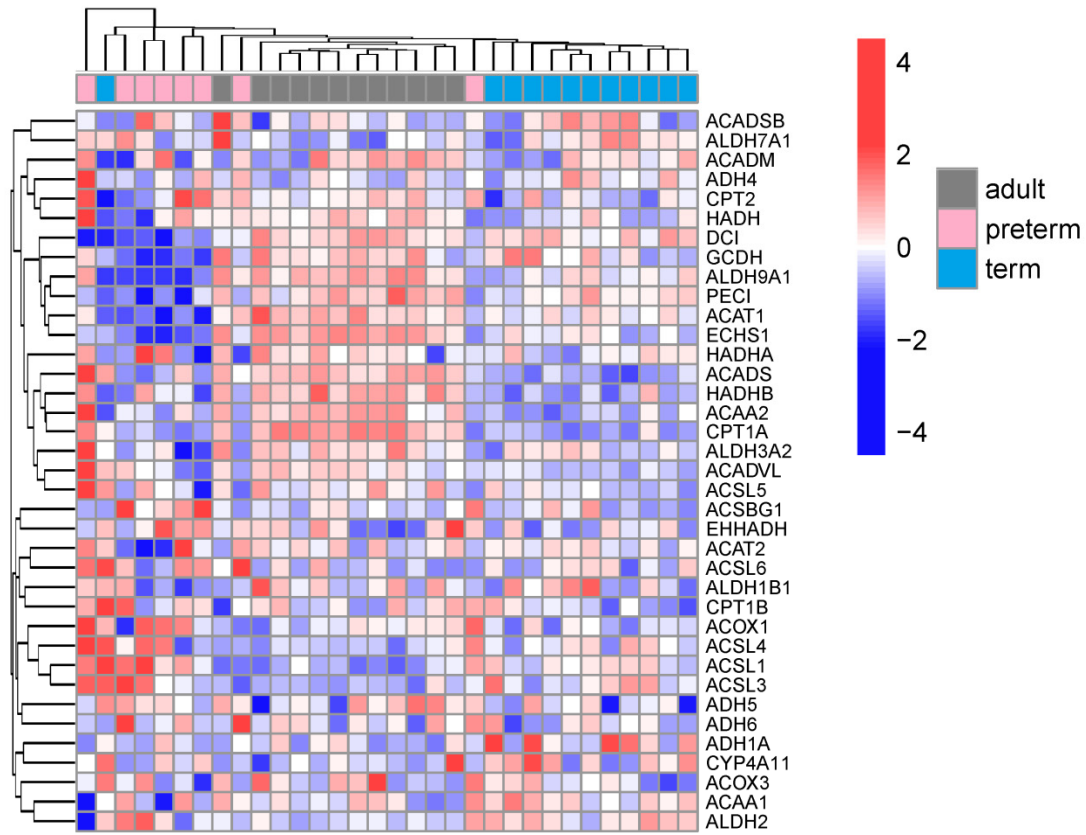

**Supplementary Figure 4: Age-related changes in expression of genes involved in fatty acid degradation** (unstimulated monocytes). Unsupervised clustering; Scale represents z-score; Data from same samples as in figure 3, 4A-C and 7H.

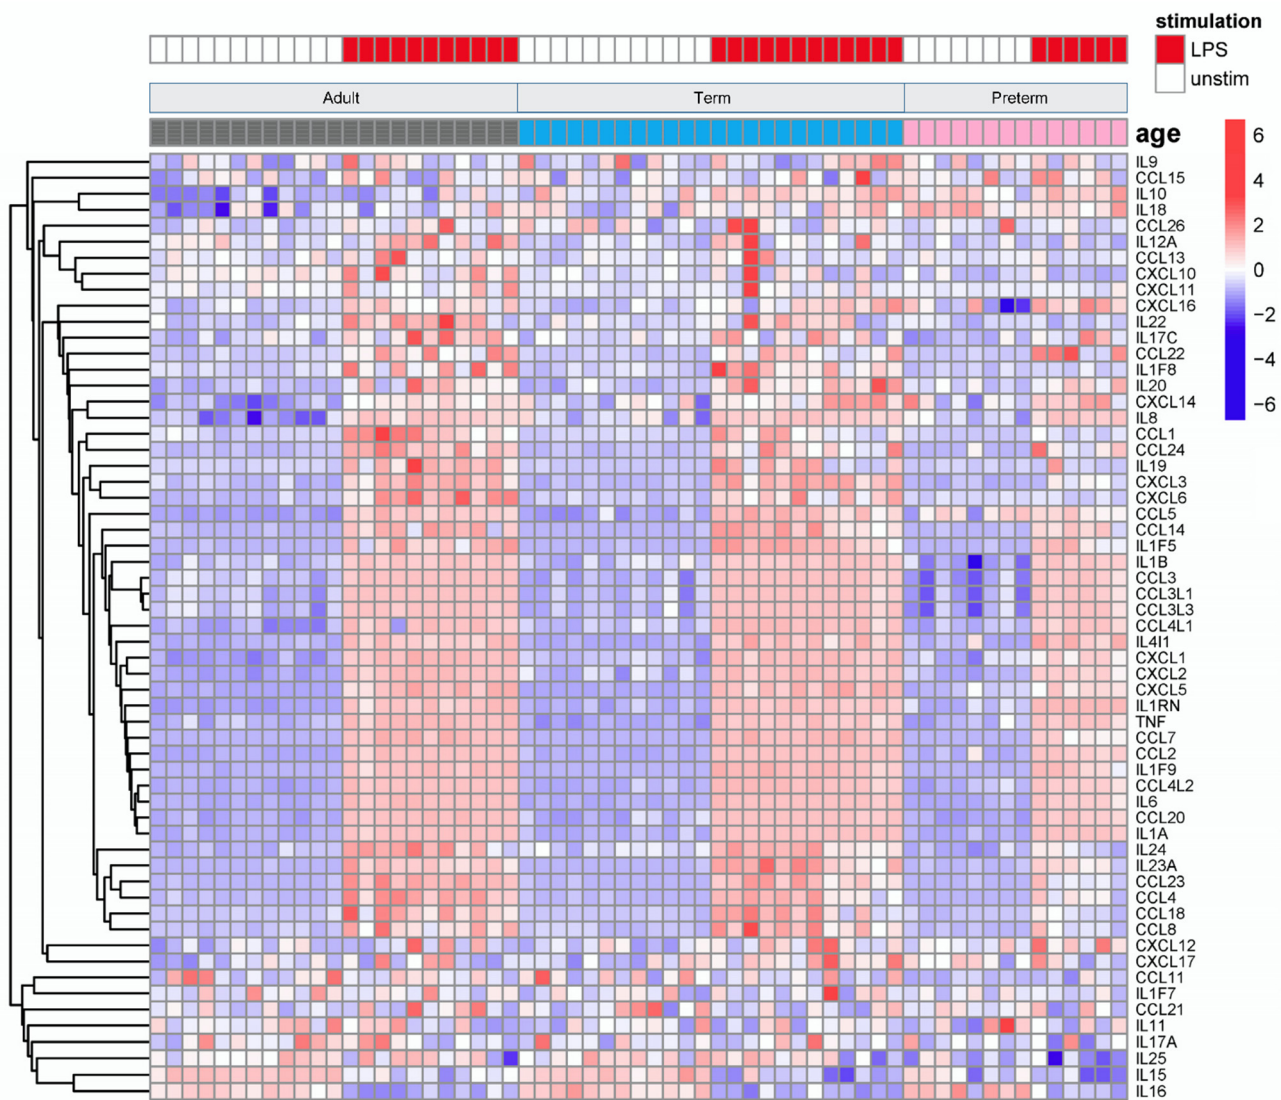

**Supplementary Figure 5: Age-related changes in cytokine/chemokine gene expression following LPS-stimulation (monocytes);** Scale represents z-score; data from same samples used in figure 3, 4A-C and 7H.

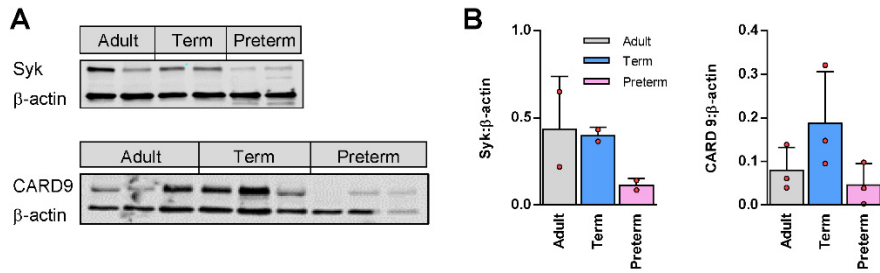

**Supplementary Figure 6: Age-related expression Syk and CARD9.** (A) Representative Western blot (unstimulated monocytes) including a 27 (Syk) and 28 weeks (CARD9) gestation preterm sample. Images cropped from same blot probes with each antibody; (B) Cumulative quantification from 2 (for Syk) and 3 (for CARD9) independent experiments (mean  $\pm$  SD).

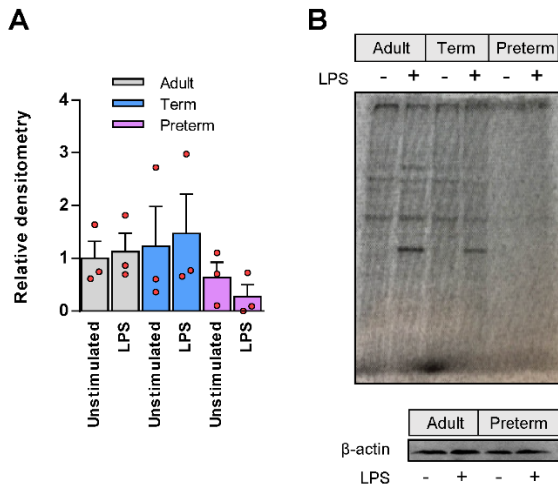

**Supplementary Figure 7: Age-related translation response in neonatal monocytes.** (A) Cumulative data from three independent  $^{35}\text{S}$ -met/cys pulse labelling experiments (preterm samples between 25 and 29 weeks<sup>2</sup>; mean  $\pm$  SD); (B) representative pulse labelling with Western blotting of same adult/preterm (29 weeks gestation) cell lysates run separately and probed for  $\beta$ -actin (there was insufficient residual sample from the term subjects for simultaneous  $\beta$ -actin blotting). Equal loading of protein in each lane was confirmed by Bradford method. Densitometry data in (A) were measured from each (entire) lane. Monocyte viability was confirmed (>95%) immediately before each experiment, by trypan blue staining.

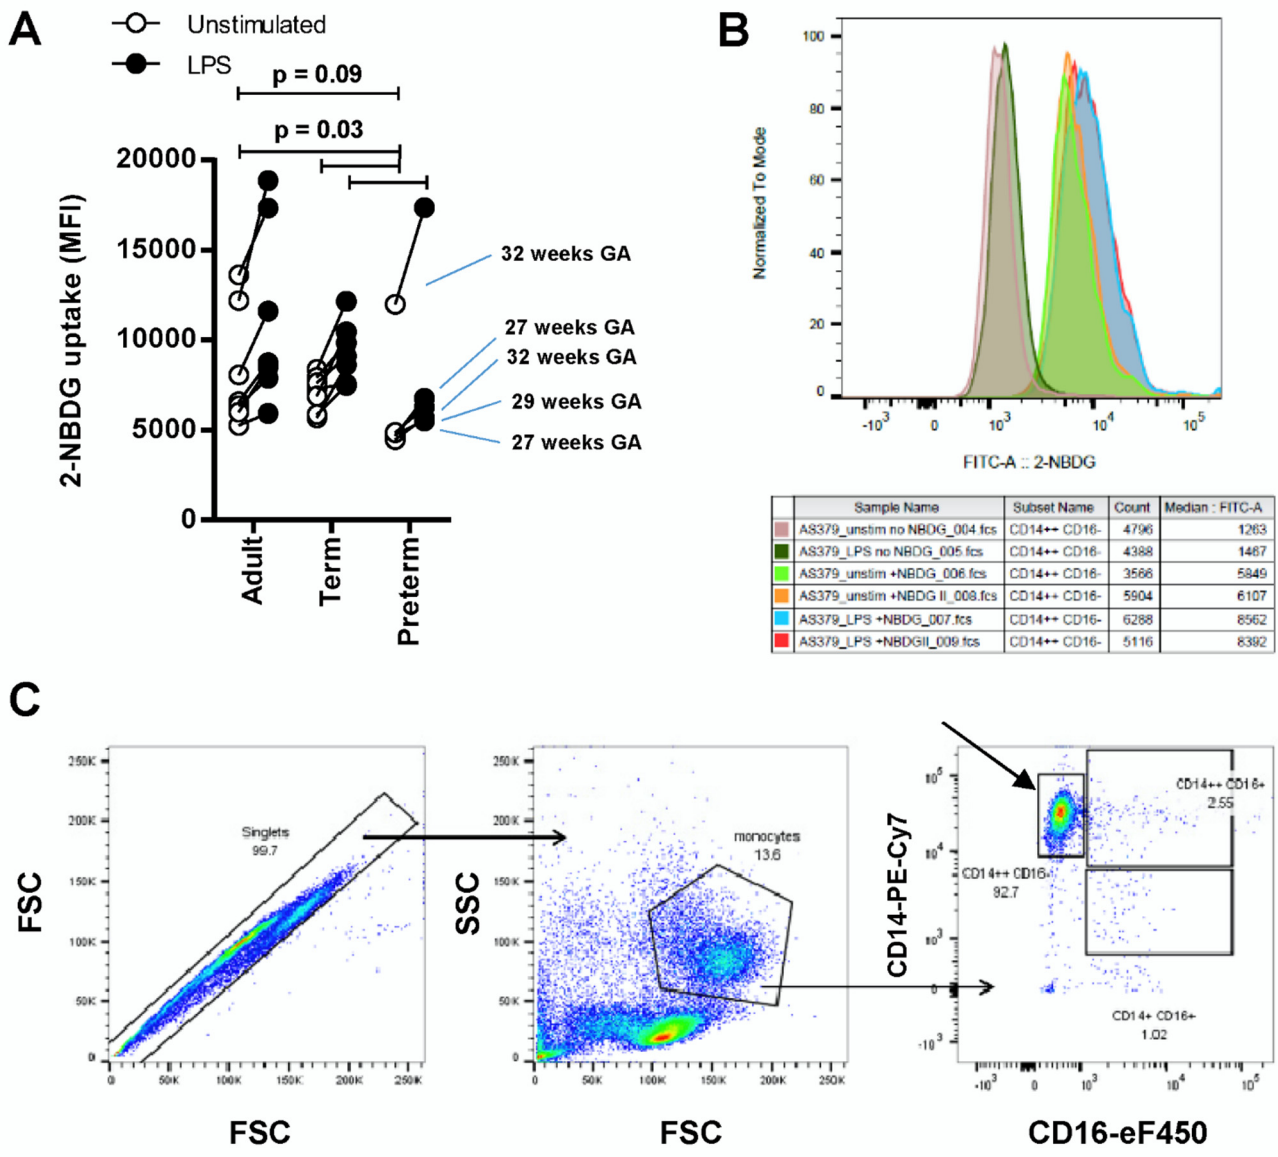

**Supplementary Figure 8: Age-related glucose uptake (monocytes).** (A) Fluorescent 2-(N-[7-Nitrobenz-2-oxa-1,3-diazol-4-yl]Amino)-2-Deoxyglucose (2NBDG) uptake measured by flow cytometry comparing preterm, term and adult monocytes, at rest and following LPS stimulation ( $n = 7$  adult, 7 term and 5 preterm samples). P value represents difference between groups using a Kolmogorov-Smirnov test (for non-parametric data). Gestational age labels for preterm samples are rounded to the closest week; (B) Representative flow cytometry histogram and (C) gating strategy for 2-NBDG measures on CD14-high (++)/CD16-negative expressing cells, from an adult sample.



Title: Electron Transport Chain  
 Availability: CC BY 2.0  
 Last modified: 10/16/2013  
 Organism: Homo sapiens

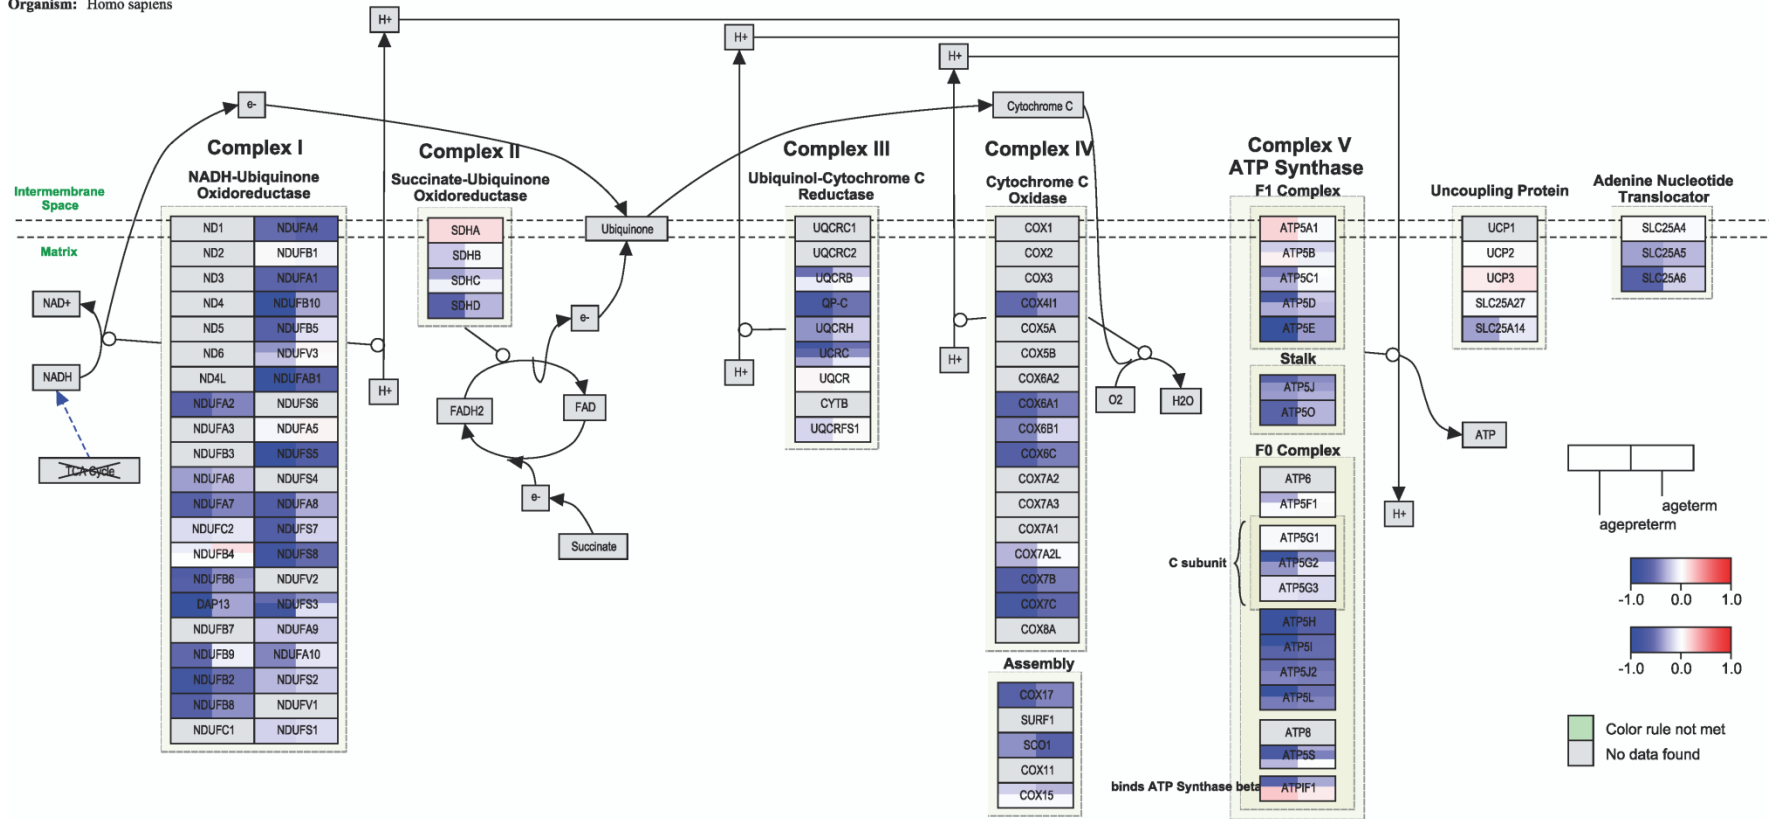

**Supplementary Figure 9: Age-related changes in expression of genes involved in mitochondrial electron-transport.** Depiction of differential expression in genes involved in Electron Transport Chain. Data from same samples used in figure 3, 4A-C and 7H. Image was created using the PathVisio software at: <https://www.pathvisio.org/about/cite-us/>. Log fold change of genes significantly affect by age (Limma, unstimulated and LPS samples, FDR 5%) is depicted comparing preterm (left of boxes) and term (right of boxes) samples to adults. Blue/red indicate decreased/increased expression in newborns compared to adults. Scale represents expression changes (log 2).

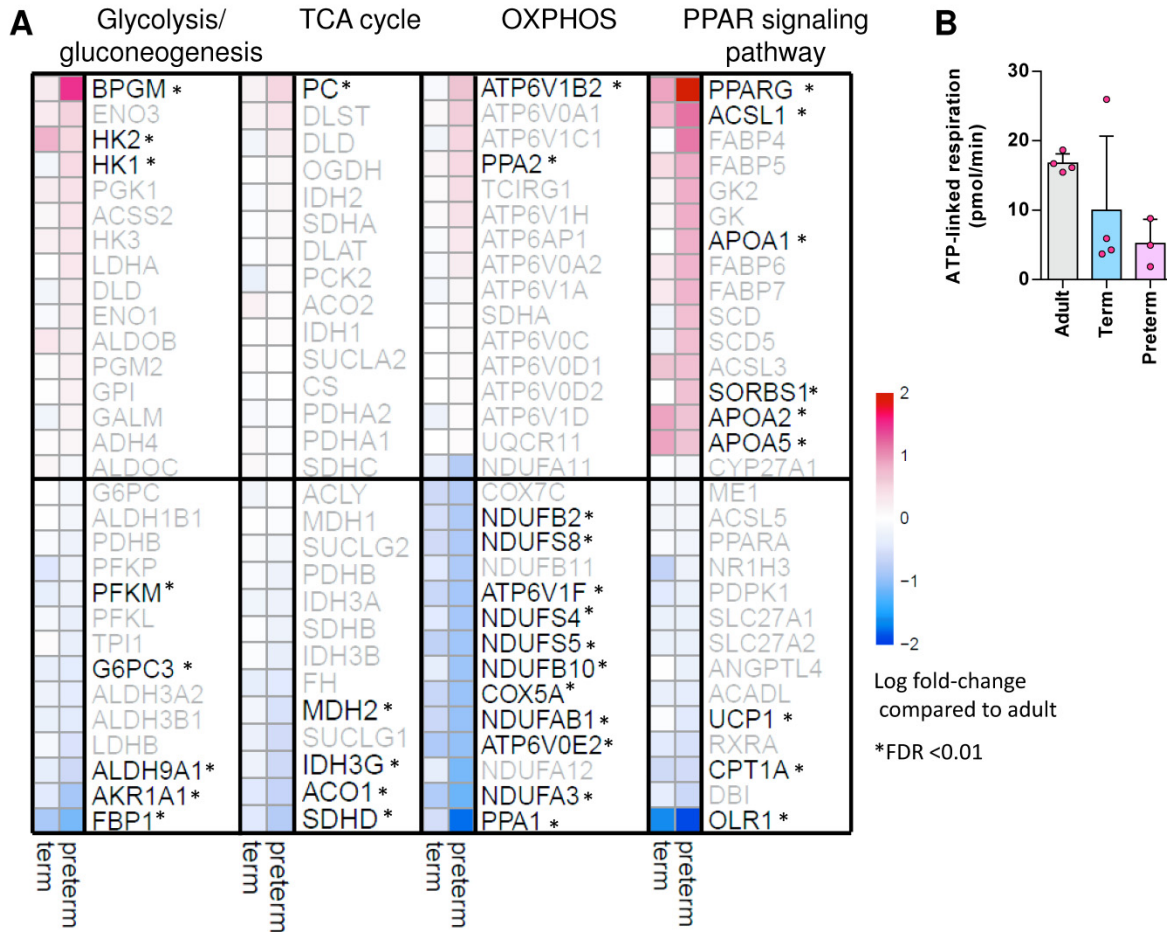

**Supplementary Figure 10: Energetic re-wiring in preterm monocytes. (A)** Heatmap of top 15 age-dependent up- and down-regulated genes (log fold-change) within each energetic pathway. Genes with a statistically significant differential expression (linear modelling; FDR<1%) between the age groups (all samples, unstimulated and LPS) are marked by an asterisk. Data from same samples used in figure 3, 4A-C and 7H; **(B)** Differential oxygen consumption rate after addition of oligomycin in glucose-containing culture media, in monocytes (bars: mean  $\pm$  SD), 3 – 4 subjects per age group.



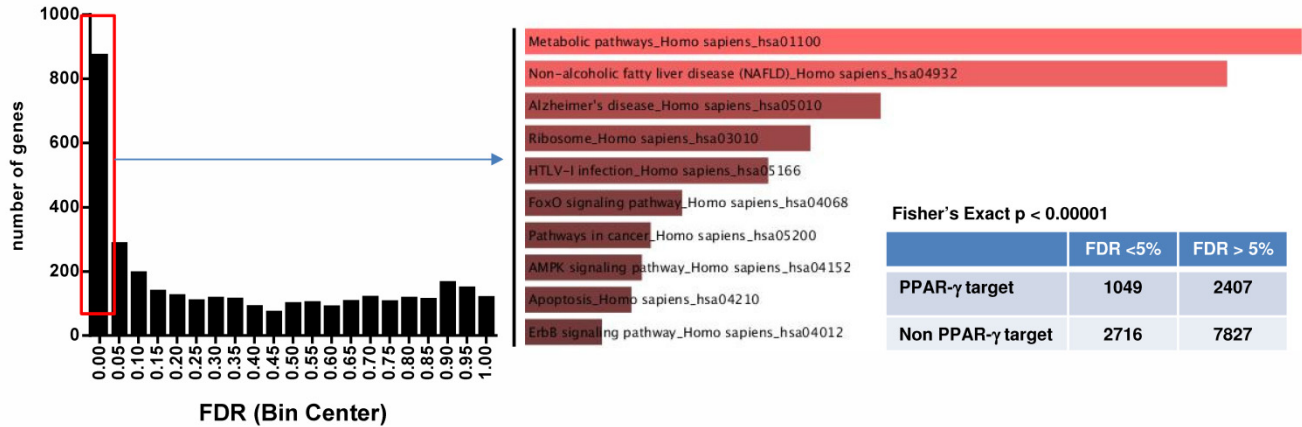

**Supplementary Figure 11: Increased PPAR- $\gamma$  activity in preterm monocytes is suggested by a significant enrichment of its target genes and mapping of these genes to metabolic pathways.** Linear modeling was performed on all samples (both unstimulated and LPS-stimulated isolated monocytes) to identify differentially expressed genes by “age”. Differentially expressed genes (FDR 5%) were then compared to known PPAR- $\gamma$  gene targets from the ChEA database (Lachman A et al, Bioinformatics 2010). Significant enrichment of PPAR- $\gamma$  targets was tested by Fisher’s Exact test followed by gene set enrichment analyses of differentially expressed PPAR- $\gamma$  gene targets using Enrichr<sup>1</sup>. Data from same samples used in figure 3, 4A-C and 7H

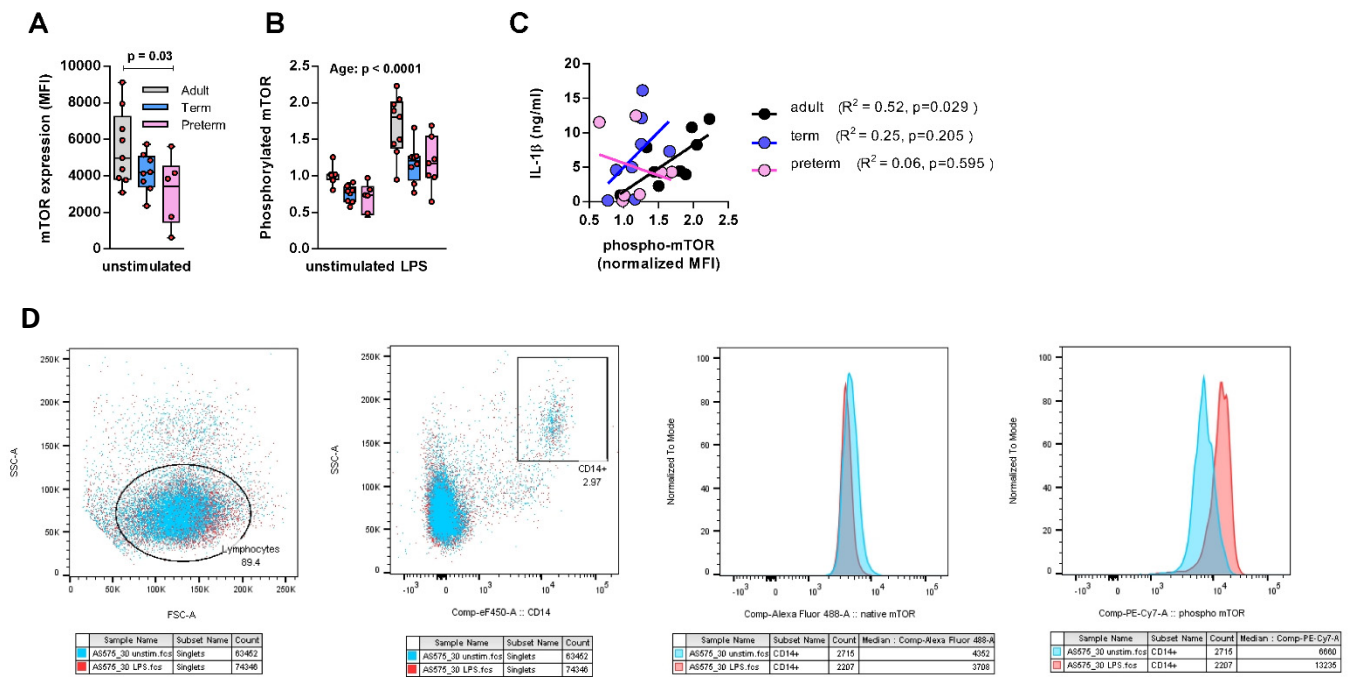

**Supplementary Figure 12:** (A) mTOR expression (2-sided unpaired t-test) and (B) phosphorylation after LPS stimulation (30 min; age-related effect by 2-way ANOVA), by flow cytometry (boxes and whiskers). 7 to 8 subjects per age group, except for some preterm samples had insufficient cells for an unstimulated condition; (C) Linear regression between LPS-induced mTOR phosphorylation and cytokine production (with goodness of fit  $R^2$  and p value). (D) Exemplary gating for native mTOR protein and mTOR phosphorylation detection. Median fluorescence intensity of mTOR phosphorylation normalized on unstimulated cells.

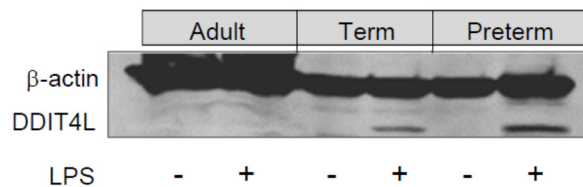

**Supplementary Figure 13:** Increased expression of DDIT4L protein in preterm monocytes (cells are from a preterm subject at 27 weeks gestation) analyzed by Western blot after 2.5 hours of LPS stimulation. Images cropped from same blot probes with each antibody.

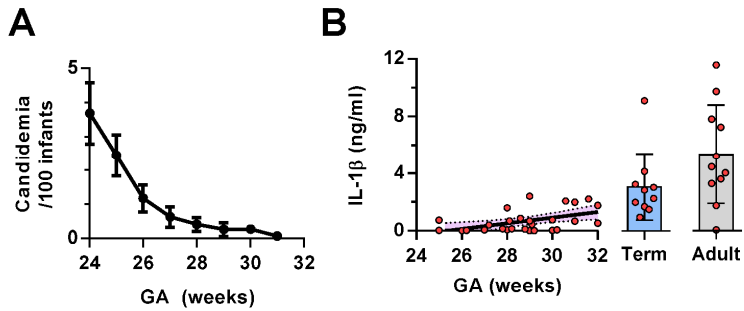

**Supplementary Figure 14:** (A) Mean gestational age-related prevalence of Candidemia in infants born below 33 weeks of gestation in Canada between 2003 and 2013 (39,336 infants; bars = 95% CI). Data was provided by the Canadian Neonatal Network ([www.canadianneonatalnetwork.org](http://www.canadianneonatalnetwork.org)); (B) Candida-induced production of IL-1 $\beta$  by gestational age in preterm (GA), or term neonatal (n=12) and adult controls (n=18; mean  $\pm$  SD); pink area and error bars = 95%CI.

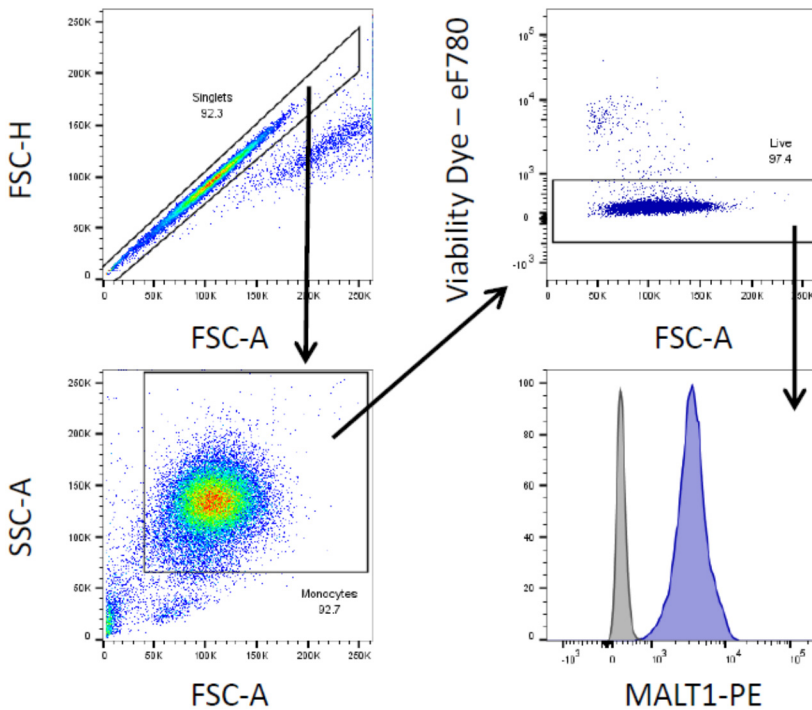

**Supplementary Figure 15:** Gating strategy for MALT1 protein detection by flow cytometry, including a histogram (bottom right) of MALT1 detection (blue) and fluorescence-minus MALT1 staining control (grey).

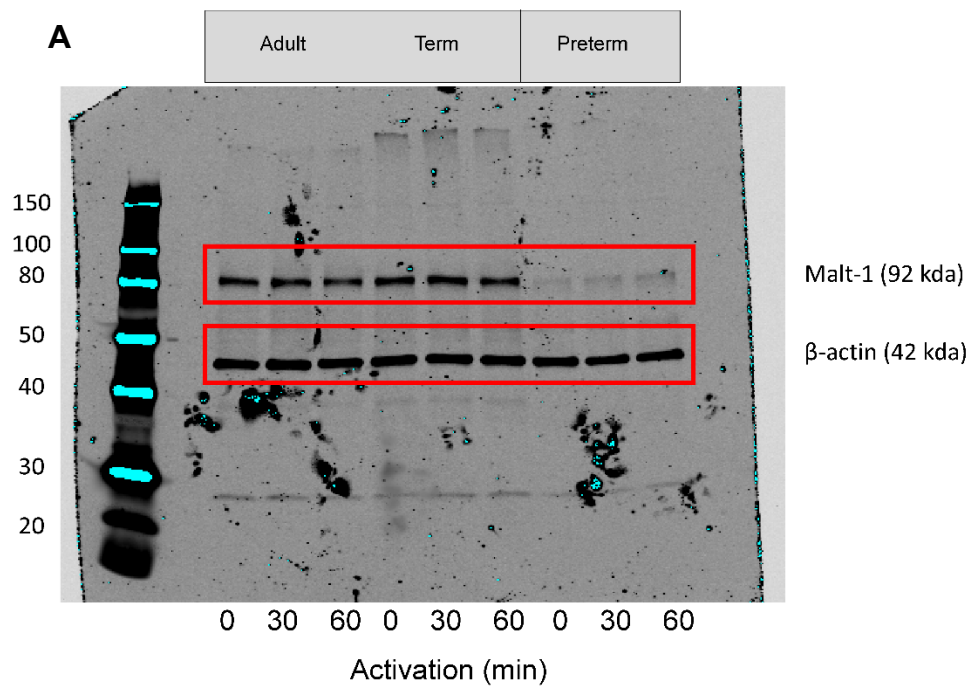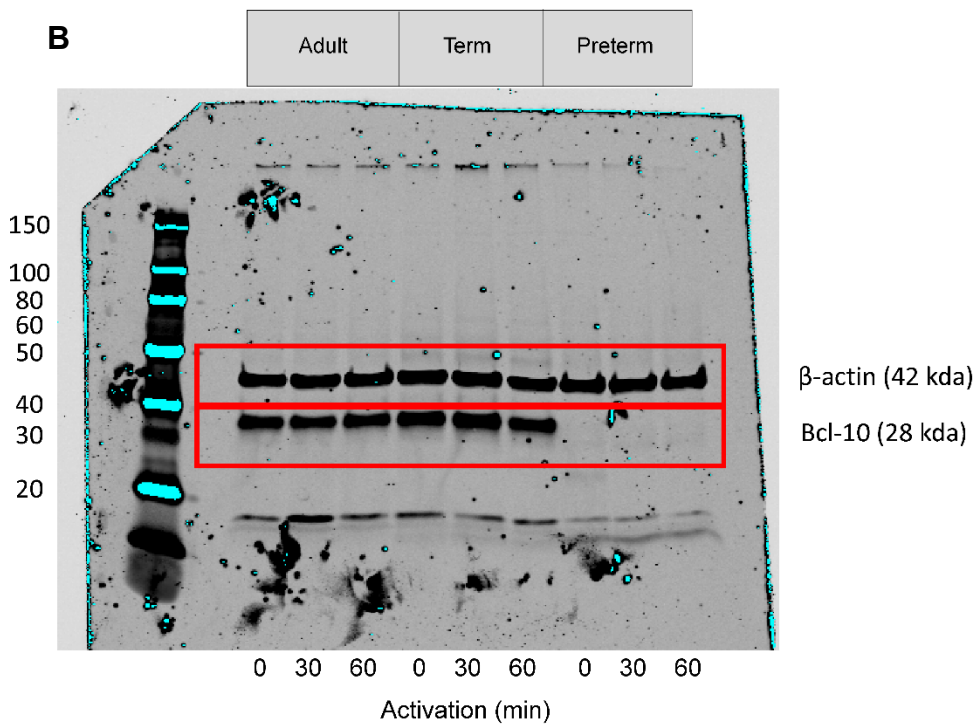

**Supplementary Figure 16:** Uncropped Western blot image for figure 5F **(A)** MALT and **(B)** Bcl10.

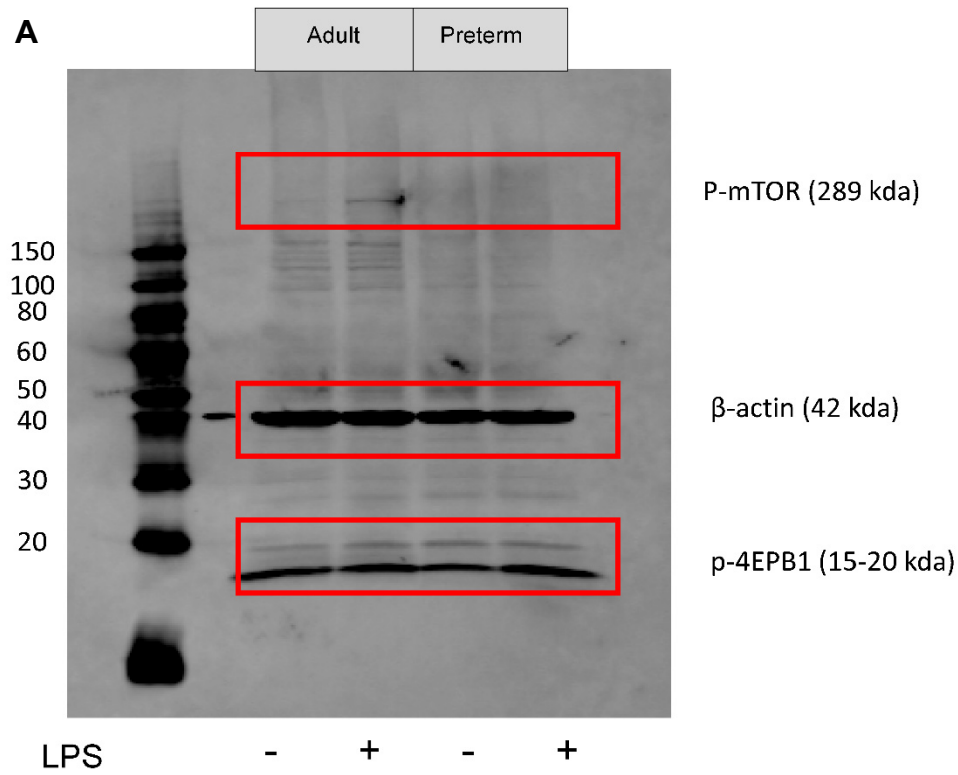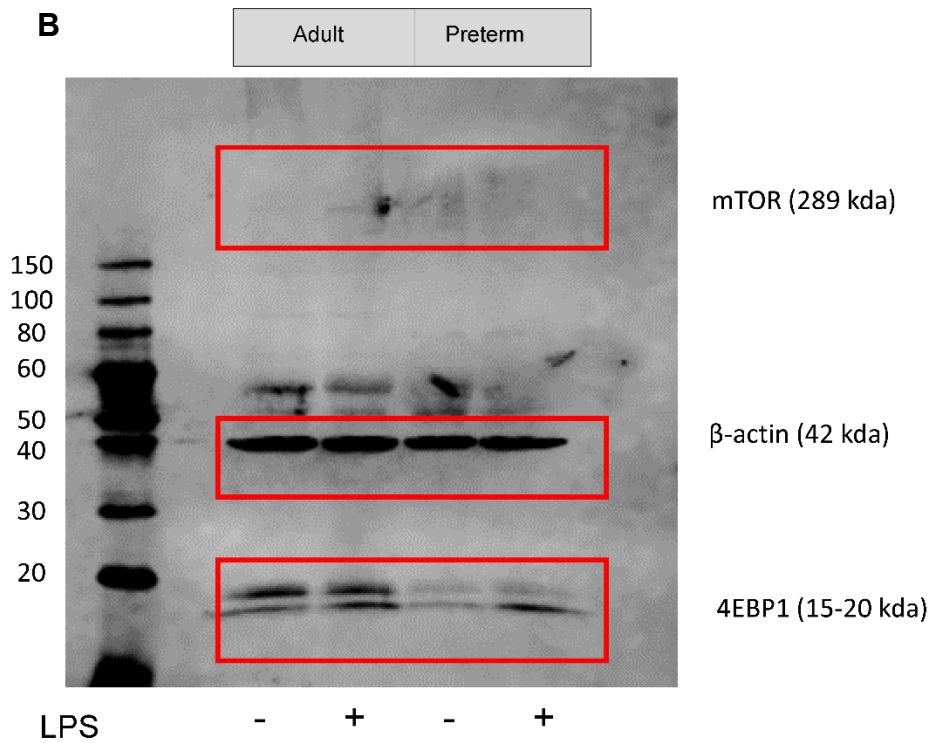

**Supplementary Figure 17:** Uncropped Western blot image for figure 7G **(A)** Phosphorylated mTOR (P-mTOR) and 4EBP1 and **(B)** mTOR and 4EBP1.

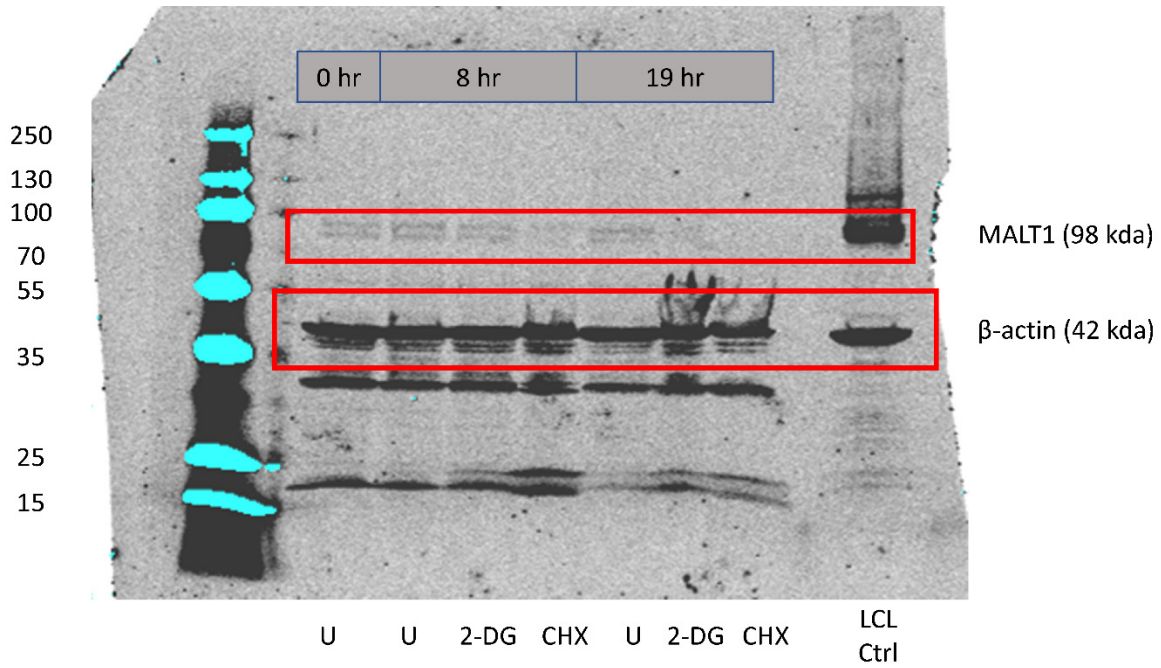

**Supplementary Figure 18:** Uncropped Western blot image for figure 8A. U = Unstimulated, 2-DG and CHX = cycloheximide conditions. LCL = Lymphoblastoid cell line (positive control for MALT1 expression).



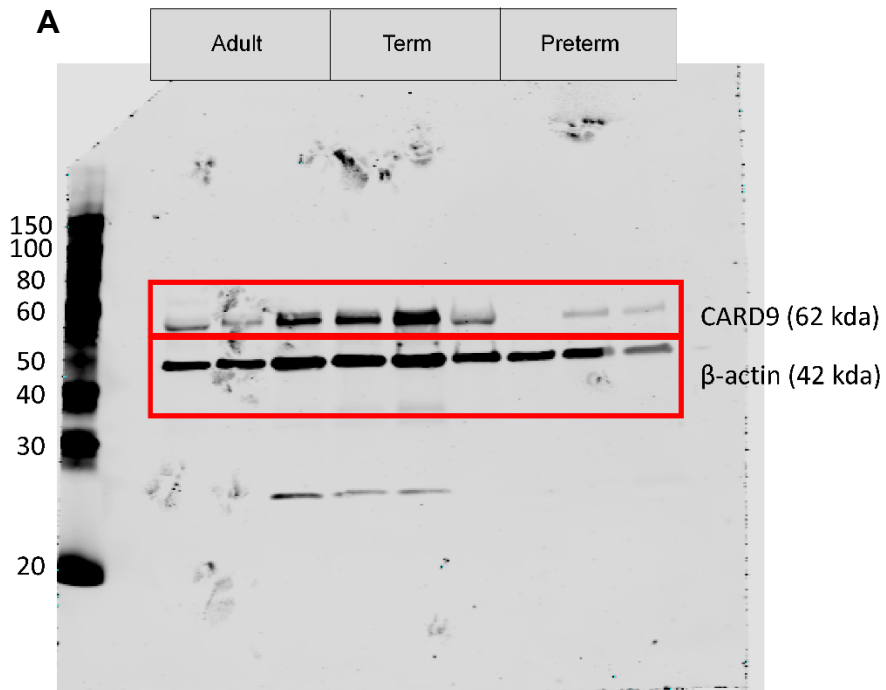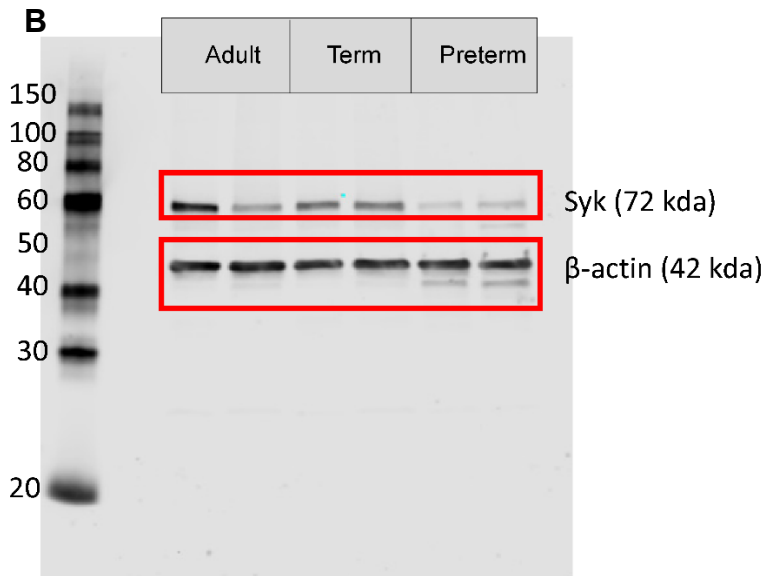

**Supplementary Figure 19:** Uncropped Western blot image for Supplementary figure 6A; **(A)** CARD9 and **(B)** Syk.

## SUPPLEMENTARY TABLES

|                                              | Gestational age (weeks) |      |      |      |      |      |      |           |
|----------------------------------------------|-------------------------|------|------|------|------|------|------|-----------|
|                                              | 24                      | 25   | 26   | 27   | 28   | 29   | 30   | 31 and 32 |
| Total number of infants                      | 1822                    | 2618 | 2975 | 3493 | 4124 | 4492 | 5560 | 14252     |
| Total number of infants who had infection(s) | 702                     | 981  | 861  | 867  | 772  | 655  | 521  | 714       |
| Total infants with <i>Candida</i> infections | 67                      | 64   | 35   | 22   | 17   | 12   | 15   | 10        |

**Supplementary table 1: Gestational age-related prevalence of infections** (all types of micro-organisms) in infants born below 33 weeks of gestation in Canada between 2003 and 2013. Data was provided by the Canadian Neonatal Network ([www.canadianneonatalnetwork.org](http://www.canadianneonatalnetwork.org)).

\*For all tables below, indicate missing clinical data either because the data could not be found, or because access to medical chart was declined by parents/legal guardians.

| Clinical variable                         | Figure panel   |                |                |                   |                |                |
|-------------------------------------------|----------------|----------------|----------------|-------------------|----------------|----------------|
|                                           | A              | B, C           | D              | E                 | F              | G              |
| N =                                       | 16             | 10             | 21             | See figure legend | 23             | 12             |
| Gestational age, mean $\pm$ SD (weeks)    | 29.1 $\pm$ 2.6 | 30.0 $\pm$ 2.4 | 28.7 $\pm$ 2.0 |                   | 28.2 $\pm$ 2.2 | 29.8 $\pm$ 2.3 |
| Birth weight, mean $\pm$ SD (weeks)       | 1278 $\pm$ 443 | 1397 $\pm$ 508 | 1174 $\pm$ 407 |                   | 1111 $\pm$ 308 | 1357 $\pm$ 511 |
| Sex, % male                               | 40             | 60             | 50             |                   | 52             | 64             |
| Received antenatal corticosteroids, % yes | 94             | 80             | 79             |                   | 91             | 83             |
| Labour, % yes                             | 75             | 60             | 55             |                   | 64             | 58             |
| Received magnesium sulfate, % yes         | 63             | 50             | 70             |                   | 73             | 42             |
| Mode of delivery, % C-section             | 50             | 30             | 45             |                   | 55             | 42             |
| N = with at least one missing value*      | 1              | 0              | 2              |                   | 2              | 1              |

**Supplementary Table 2:** Additional clinical data for preterm subjects in figure 1.

| Clinical variable                         | Figure panel |                |                |
|-------------------------------------------|--------------|----------------|----------------|
|                                           | A            | B              | C, D           |
| N = *                                     | N/A          | 16             | 4              |
| Gestational age, mean $\pm$ SD (weeks)    |              | 29.1 $\pm$ 2.6 | 27.6 $\pm$ 1.9 |
| Birth weight, mean $\pm$ SD (weeks)       |              | 1259 $\pm$ 481 | 1162 $\pm$ 350 |
| Sex, % male                               |              | 43             | 50             |
| Received antenatal corticosteroids, % yes |              | 92             | 100            |
| Labour, % yes                             |              | 67             | 100            |
| Received magnesium sulfate, % yes         |              | 60             | 100            |
| Mode of delivery, % C-section             |              | 53             | 50             |
| N = with at least one missing value*      |              | 2              | 0              |

**Supplementary Table 3:** Additional clinical for preterm subjects in figure 2.

| Clinical variable                         |                |
|-------------------------------------------|----------------|
| N = *                                     | 8              |
| Gestational age, mean $\pm$ SD (weeks)    | 26.9 $\pm$ 1.6 |
| Birth weight, mean $\pm$ SD (weeks)       | 1038 $\pm$ 205 |
| Sex, % male                               | 50             |
| Received antenatal corticosteroids, % yes | 100            |
| Labour, % yes                             | 75             |
| Received magnesium sulfate, % yes         | 63             |
| Mode of delivery, % C-section             | 38             |
| N = with at least one missing value*      | 0              |

**Supplementary Table 4:** Additional clinical for preterm subjects in figure 3, 4A, B and C, and Supplementary Figures 3, 4, 5, 9, 10A and 11.

| Clinical variable                         |                |
|-------------------------------------------|----------------|
| N = *                                     | 7              |
| Gestational age, mean $\pm$ SD (weeks)    | 29.7 $\pm$ 3.2 |
| Birth weight, mean $\pm$ SD (weeks)       | 1544 $\pm$ 550 |
| Sex, % male                               | 80             |
| Received antenatal corticosteroids, % yes | 60             |
| Labour, % yes                             | 60             |
| Received magnesium sulfate, % yes         | 80             |
| Mode of delivery, % C-section             | 60             |
| N = with at least one missing value*      | 2              |

**Supplementary Table 5:** Additional clinical for preterm subjects in figure 4D (includes 4 samples in Supplementary Figure 1).

| Clinical variable                         | Figure panel |                |                |                |                   |                |
|-------------------------------------------|--------------|----------------|----------------|----------------|-------------------|----------------|
|                                           | A            | B, C           | D              | E              | F                 | G, H           |
| N = *                                     | N/A          | 4              | 6              | 10             | See figure legend | 4              |
| Gestational age, mean $\pm$ SD (weeks)    |              | 28.8 $\pm$ 1.4 | 27.6 $\pm$ 2.1 | 27.6 $\pm$ 2.3 |                   | 29.6 $\pm$ 1.1 |
| Birth weight, mean $\pm$ SD (weeks)       |              | 1457 $\pm$ 215 | 1039 $\pm$ 209 | 991 $\pm$ 324  |                   | 1314 $\pm$ 205 |
| Sex, % male                               |              | 100            | 50             | 38             |                   | 50             |
| Received antenatal corticosteroids, % yes |              | 100            | 100            | 89             |                   | 100            |
| Labour, % yes                             |              | 50             | 83             | 56             |                   | 75             |
| Received magnesium sulfate, % yes         |              | 75             | 50             | 78             |                   | 50             |
| Mode of delivery, % C-section             |              | 75             | 17             | 56             |                   | 50             |
| N = with at least one missing value*      |              | 0              | 0              | 1              |                   | 0              |

**Supplementary Table 6:** Additional clinical for preterm subjects in figure 5.

| Clinical variable                         | Figure panel |                |                |     |                   |                            |
|-------------------------------------------|--------------|----------------|----------------|-----|-------------------|----------------------------|
|                                           | A            | C              | D              | E,F | G                 | H                          |
| N = *                                     | N/A          | 3              | 10             | N/A | See figure legend | Same as Figure 3, 4A, B, C |
| Gestational age, mean $\pm$ SD (weeks)    |              | 28.8 $\pm$ 2.3 | 28.8 $\pm$ 3.1 |     |                   |                            |
| Birth weight, mean $\pm$ SD (weeks)       |              | 1330 $\pm$ 625 | 1220 $\pm$ 575 |     |                   |                            |
| Sex, % male                               |              | 0              | 56             |     |                   |                            |
| Received antenatal corticosteroids, % yes |              | 100            | 100            |     |                   |                            |
| Labour, % yes                             |              | 33             | 60             |     |                   |                            |
| Received magnesium sulfate, % yes         |              | 33             | 70             |     |                   |                            |
| Mode of delivery, % C-section             |              | 67             | 60             |     |                   |                            |
| N = with at least one missing value*      |              | 0              | 1              |     |                   |                            |

**Supplementary Table 7:** Additional clinical for preterm subjects in figure 7 and Supplementary Figure 10B (data for figure panel 7C).

| Clinical variable                         |                |
|-------------------------------------------|----------------|
| N = *                                     | 4              |
| Gestational age, mean $\pm$ SD (weeks)    | 30.4 $\pm$ 3.3 |
| Birth weight, mean $\pm$ SD (weeks)       | 1668 $\pm$ 550 |
| Sex, % male                               | 100            |
| Received antenatal corticosteroids, % yes | 50             |
| Labour, % yes                             | 50             |
| Received magnesium sulfate, % yes         | 75             |
| Mode of delivery, % C-section             | 50             |
| N = with at least one missing value*      | 0              |

**Supplementary Table 8:** Additional clinical for preterm subjects in Supplementary figure 1.

| Clinical variable                         | A, B             |
|-------------------------------------------|------------------|
| N = *                                     | 6                |
| Gestational age, mean $\pm$ SD (weeks)    | 26.8 $\pm$ 1.7   |
| Birth weight, mean $\pm$ SD (weeks)       | 1066.3 $\pm$ 281 |
| Sex, % male                               | 67               |
| Received antenatal corticosteroids, % yes | 100              |
| Labour, % yes                             | 83               |
| Received magnesium sulfate, % yes         | 67               |
| Mode of delivery, % C-section             | 67               |
| N = with at least one missing value*      | 0                |

**Supplementary Table 9:** Additional clinical for preterm subjects in Supplementary figure 2.

| Clinical variable                         |                 |
|-------------------------------------------|-----------------|
| N = *                                     | 3               |
| Gestational age, mean $\pm$ SD (weeks)    | 29.0 $\pm$ 2.6  |
| Birth weight, mean $\pm$ SD (weeks)       | 940.3 $\pm$ 177 |
| Sex, % male                               | 67              |
| Received antenatal corticosteroids, % yes | 67              |
| Labour, % yes                             | 33              |
| Received magnesium sulfate, % yes         | 67              |
| Mode of delivery, % C-section             | 100             |
| N = with at least one missing value*      | 1               |

**Supplementary Table 10:** Additional clinical for preterm subjects in Supplementary figure 6B.

| Clinical variable                         |                |
|-------------------------------------------|----------------|
| N = *                                     | 6              |
| Gestational age, mean $\pm$ SD (weeks)    | 26.7 $\pm$ 1.3 |
| Birth weight, mean $\pm$ SD (weeks)       | 979 $\pm$ 490  |
| Sex, % male                               | 20             |
| Received antenatal corticosteroids, % yes | 80             |
| Labour, % yes                             | 60             |
| Received magnesium sulfate, % yes         | 80             |
| Mode of delivery, % C-section             | 100            |
| N = with at least one missing value*      | 1              |

**Supplementary Table 11:** Additional clinical for preterm subjects in Supplementary Figure 7A (including 2 pooled samples in 1<sup>st</sup> experiment and 3 pooled samples in 3<sup>rd</sup> experiment).

| Clinical variable                         |                |
|-------------------------------------------|----------------|
| N = *                                     | 5              |
| Gestational age, mean $\pm$ SD (weeks)    | 28.9 $\pm$ 2.2 |
| Birth weight, mean $\pm$ SD (weeks)       | 1211 $\pm$ 691 |
| Sex, % male                               | 25             |
| Received antenatal corticosteroids, % yes | 100            |
| Labour, % yes                             | 25             |
| Received magnesium sulfate, % yes         | 100            |
| Mode of delivery, % C-section             | 75             |
| N = with at least one missing value*      | 1              |

**Supplementary Table 12:** Additional clinical for preterm subjects in Supplementary Figure 8A.

| Clinical variable                         |                |
|-------------------------------------------|----------------|
| N = *                                     | 7              |
| Gestational age, mean $\pm$ SD (weeks)    | 29.0 $\pm$ 2.7 |
| Birth weight, mean $\pm$ SD (weeks)       | 1311 $\pm$ 609 |
| Sex, % male                               | 86             |
| Received antenatal corticosteroids, % yes | 86             |
| Labour, % yes                             | 71             |
| Received magnesium sulfate, % yes         | 43             |
| Mode of delivery, % C-section             | 71             |
| N = with at least one missing value*      | 0              |

**Supplementary Table 13:** Additional clinical for preterm subjects in Supplementary Figure 12A-C.

| Clinical variable                         |                |
|-------------------------------------------|----------------|
| N = *                                     | 20             |
| Gestational age, mean $\pm$ SD (weeks)    | 28.8 $\pm$ 2.1 |
| Birth weight, mean $\pm$ SD (weeks)       | 1181 $\pm$ 417 |
| Sex, % male                               | 47             |
| Received antenatal corticosteroids, % yes | 79             |
| Labour, % yes                             | 53             |
| Received magnesium sulfate, % yes         | 74             |
| Mode of delivery, % C-section             | 47             |
| N = with at least one missing value*      | 1              |

**Supplementary Table 14:** Additional clinical for preterm subjects in Supplementary Figure 14B.



| <b>Gene/primer name</b>           | <b>Direction</b> | <b>Sequence</b>                      |
|-----------------------------------|------------------|--------------------------------------|
| <i>Clec7a</i> (dectin-1 receptor) | forward          | 5'- TCGACTCTCAAAGCAATACCAG -3'       |
|                                   | reverse          | 5'- CCACAGCTATCACCAGTATTACC -3'      |
| <i>Malt1</i>                      | forward          | 5'-AGGCTATGGAACACACTGAAG-3'          |
|                                   | reverse          | 5'-ACCACTGATATTGAACAAAAGGATG-3'      |
| <i>Card9</i>                      | forward          | 5'-CACCCAGCTCTCAGACAAAG-3'           |
|                                   | reverse          | 5'-CTTAACAAACGGCCCCAATG-3'           |
| <i>Bcl10</i>                      | forward          | 5'-GAAATATAAAACTAGAACATCTGAAAGGAC-3' |
|                                   | reverse          | 5'-TGGTACATGACAGTGGATGC-3'           |
| <i>Actb</i>                       | forward          | 5'-CCTTGCACATGCCGGAG-3'              |
|                                   | reverse          | 5'-ACAGAGCCTCGCCTTTG-3'              |
| dsRED                             | forward          | 5'- TGAAGCTGAAGGTGACCAAG-3'          |
|                                   | reverse          | 5'- GGACAGCTTCTTGTAGTCG-3'           |

**Supplementary table 15: Primer sequence used in qPCR gene amplification.**

## SUPPLEMENTARY REFERENCE

1. Kuleshov, M.V., *et al.* Enrichr: a comprehensive gene set enrichment analysis web server 2016 update. *Nucleic Acids Res* **44**, W90-97 (2016).
