# Supplementary material for: Cellular metabolism constrains innate immune responses in early human ontogeny
Source: PubMed Central journal article supplement (PMC6240060; doi:10.1038/s41467-018-07215-9), 2018-11-16
Supplement: 41467_2018_7215_MOESM3_ESM.pdf [file 41467_2018_7215_MOESM3_ESM.pdf]

## **Description of Additional Supplementary Files**

### **Supplementary Data 1**

**Description:** Gene Ontology analysis based on network of differentially expressed genes (adjusted  $p < 0.05$ ) in unstimulated preterm monocytes compared to the combined groups of term and adult monocytes. Cluster 1 includes upregulated genes, whereas cluster 2 includes downregulated genes (selected for input into the analysis based on  $>2$ -fold differential expression;  $FDR < 0.01$ ). Sorted by decreasing number of genes in cluster 2.

### **Supplementary Data 2**

**Description:** Gene Ontology analysis based on network of genes significantly differentially expressed (adjusted  $p < 0.05$ ) between LPS stimulated and unstimulated preterm monocytes, compared to the combined groups of term and adult monocytes. Cluster 1 includes genes upregulated and cluster 2 included genes downregulated upon LPS (selected for input into the analysis based on  $>2$ -fold differential expression;  $FDR < 0.01$ ). Sorted by decreasing adjusted significance.

### **Supplementary Data 3**

**Description:** Normalized expression values (log<sub>2</sub> scale) of manually selected genes involved in the mTOR pathway.
