# Supplementary material for: Cellular metabolism constrains innate immune responses in early human ontogeny
Source: PubMed Central journal article supplement (PMC6240060; doi:10.1038/s41467-018-07215-9), 2018-11-16
Supplement: 41467_2018_7215_MOESM7_ESM.pdf [file 41467_2018_7215_MOESM7_ESM.pdf]

## Reporting Summary

Nature Research wishes to improve the reproducibility of the work that we publish. This form provides structure for consistency and transparency in reporting. For further information on Nature Research policies, see [Authors & Referees](#) and the [Editorial Policy Checklist](#).

### Statistical parameters

When statistical analyses are reported, confirm that the following items are present in the relevant location (e.g. figure legend, table legend, main text, or Methods section).

n/a Confirmed

- |                                     |                                     |                                                                                                                                                                                                                                                                     |
|-------------------------------------|-------------------------------------|---------------------------------------------------------------------------------------------------------------------------------------------------------------------------------------------------------------------------------------------------------------------|
| <input type="checkbox"/>            | <input checked="" type="checkbox"/> | The <u>exact sample size</u> ( $n$ ) for each experimental group/condition, given as a discrete number and unit of measurement                                                                                                                                      |
| <input type="checkbox"/>            | <input checked="" type="checkbox"/> | An indication of whether measurements were taken from distinct samples or whether the same sample was measured repeatedly                                                                                                                                           |
| <input type="checkbox"/>            | <input checked="" type="checkbox"/> | The statistical test(s) used AND whether they are one- or two-sided<br><i>Only common tests should be described solely by name; describe more complex techniques in the Methods section.</i>                                                                        |
| <input type="checkbox"/>            | <input checked="" type="checkbox"/> | A description of all covariates tested                                                                                                                                                                                                                              |
| <input type="checkbox"/>            | <input checked="" type="checkbox"/> | A description of any assumptions or corrections, such as tests of normality and adjustment for multiple comparisons                                                                                                                                                 |
| <input type="checkbox"/>            | <input checked="" type="checkbox"/> | A full description of the statistics including <u>central tendency</u> (e.g. means) or other basic estimates (e.g. regression coefficient) AND <u>variation</u> (e.g. standard deviation) or associated <u>estimates of uncertainty</u> (e.g. confidence intervals) |
| <input checked="" type="checkbox"/> | <input type="checkbox"/>            | For null hypothesis testing, the test statistic (e.g. $F$ , $t$ , $r$ ) with confidence intervals, effect sizes, degrees of freedom and $P$ value noted<br><i>Give <math>P</math> values as exact values whenever suitable.</i>                                     |
| <input checked="" type="checkbox"/> | <input type="checkbox"/>            | For Bayesian analysis, information on the choice of priors and Markov chain Monte Carlo settings                                                                                                                                                                    |
| <input checked="" type="checkbox"/> | <input type="checkbox"/>            | For hierarchical and complex designs, identification of the appropriate level for tests and full reporting of outcomes                                                                                                                                              |
| <input type="checkbox"/>            | <input checked="" type="checkbox"/> | Estimates of effect sizes (e.g. Cohen's $d$ , Pearson's $r$ ), indicating how they were calculated                                                                                                                                                                  |
| <input type="checkbox"/>            | <input checked="" type="checkbox"/> | Clearly defined error bars<br><i>State explicitly what error bars represent (e.g. SD, SE, CI)</i>                                                                                                                                                                   |

Our web collection on [statistics for biologists](#) may be useful.

### Software and code

Policy information about [availability of computer code](#)

Data collection

The data collected was entered either directly in GraphPad or in an excel spreadsheet.

Data analysis

GraphPad Prism v 6.07 was used for statistical analyses (as indicated in Statical analysis section of the methods). Microscopy images (Figure 1A) were collected and analyzed using IDEAS. Flow cytometry data was analyzed using FlowJo.

For manuscripts utilizing custom algorithms or software that are central to the research but not yet described in published literature, software must be made available to editors/reviewers upon request. We strongly encourage code deposition in a community repository (e.g. GitHub). See the Nature Research [guidelines for submitting code & software](#) for further information.

### Data

Policy information about [availability of data](#)

All manuscripts must include a [data availability statement](#). This statement should provide the following information, where applicable:

- Accession codes, unique identifiers, or web links for publicly available datasets
- A list of figures that have associated raw data
- A description of any restrictions on data availability

Data availability statement has been included: Microarray data used in Fig. 3, 4A-C, 7H, Supplementary Table 1, 2 and 3, and Supplementary Fig. 3, 4, 5, 9 10A and 11 have been deposited in GEO under accession code GSE104510 [<https://www.ncbi.nlm.nih.gov/geo/query/acc.cgi?acc=GSE104510>]. Uncut Western blot figures

are provided as Supplementary Information. All other data, including raw data used in each figure will be provided upon reasonable request to the corresponding author, and provided that the nature of the request complies with our institutional ethics board policy.

## Field-specific reporting

Please select the best fit for your research. If you are not sure, read the appropriate sections before making your selection.

Life sciences     Behavioural & social sciences     Ecological, evolutionary & environmental sciences

For a reference copy of the document with all sections, see [nature.com/authors/policies/ReportingSummary-flat.pdf](https://www.nature.com/authors/policies/ReportingSummary-flat.pdf)

## Life sciences study design

All studies must disclose on these points even when the disclosure is negative.

|                 |                                                                                                                                                                                                                                                                                                                                                                                                    |
|-----------------|----------------------------------------------------------------------------------------------------------------------------------------------------------------------------------------------------------------------------------------------------------------------------------------------------------------------------------------------------------------------------------------------------|
| Sample size     | For each experiment, sample size was estimated based on the variance from initial 3 to 5 replicates per preterm, term or adult age group.                                                                                                                                                                                                                                                          |
| Data exclusions | Experiments were routinely conducted to optimize each of the experimental conditions in this article, often using adult or term neonatal samples. These experiments are not included in the article. Except for optimization experiments, no data were excluded.                                                                                                                                   |
| Replication     | Experiments were repeated at least twice. The number of replicate experiments have been indicated throughout the article.                                                                                                                                                                                                                                                                          |
| Randomization   | Human subjects were randomly recruited over time, to balance the number of replicates between 3 age groups: preterms, terms and adults. Over the course of the study, some efforts were made to include preterm subjects of specific gestational age for a specific experiment, such that the gestational age distributions of the preterm samples were comparable from one experiment to another. |
| Blinding        | Investigators were not blind to the allocation of samples between age group. This was not possible given that the samples came from easily identifiable donor sources.                                                                                                                                                                                                                             |

## Reporting for specific materials, systems and methods

### Materials & experimental systems

| n/a                                 | Involvement                                                     |
|-------------------------------------|-----------------------------------------------------------------|
| <input checked="" type="checkbox"/> | <input type="checkbox"/> Unique biological materials            |
| <input checked="" type="checkbox"/> | <input type="checkbox"/> Antibodies                             |
| <input checked="" type="checkbox"/> | <input type="checkbox"/> Eukaryotic cell lines                  |
| <input checked="" type="checkbox"/> | <input type="checkbox"/> Palaeontology                          |
| <input checked="" type="checkbox"/> | <input type="checkbox"/> Animals and other organisms            |
| <input type="checkbox"/>            | <input checked="" type="checkbox"/> Human research participants |

### Methods

| n/a                                 | Involvement                                        |
|-------------------------------------|----------------------------------------------------|
| <input checked="" type="checkbox"/> | <input type="checkbox"/> ChIP-seq                  |
| <input type="checkbox"/>            | <input checked="" type="checkbox"/> Flow cytometry |
| <input checked="" type="checkbox"/> | <input type="checkbox"/> MRI-based neuroimaging    |

## Human research participants

Policy information about [studies involving human research participants](#)

|                            |                                                                                                                                                                                                                                                                                                                                                                                                                                                                                                   |
|----------------------------|---------------------------------------------------------------------------------------------------------------------------------------------------------------------------------------------------------------------------------------------------------------------------------------------------------------------------------------------------------------------------------------------------------------------------------------------------------------------------------------------------|
| Population characteristics | Cord blood was obtained from preterm infants (<33 weeks) and term infants (>38 to <41 weeks) born by elective caesarean section in absence of labor, and peripheral blood was obtained from healthy adult volunteers recruited at the BC Children's Hospital Research Institute. The clinical characteristics of the preterm subjects are detailed in the Supplementary Data 1 file.                                                                                                              |
| Recruitment                | Participants were randomly approached for recruitment, sequentially. Women at risk of delivery preterm below 33 weeks were approached during admission to the BC Women's Hospital. Women undergoing an elective Cesarean section >38 weeks at BC Women's Hospital were approached on the morning of delivery, and invited to participate to this research. Healthy adults were randomly approached during normal work hours, for blood donation at the BC Children's Hospital Research Institute. |

## Flow Cytometry

### Plots

Confirm that:

- The axis labels state the marker and fluorochrome used (e.g. CD4-FITC).
- The axis scales are clearly visible. Include numbers along axes only for bottom left plot of group (a 'group' is an analysis of identical markers).
- All plots are contour plots with outliers or pseudocolor plots.
- A numerical value for number of cells or percentage (with statistics) is provided.

### Methodology

|                           |                                                                                                                                                                                                             |
|---------------------------|-------------------------------------------------------------------------------------------------------------------------------------------------------------------------------------------------------------|
| Sample preparation        | a BC LSR II flow cytometer (Becton Dickinson)                                                                                                                                                               |
| Instrument                | Data were acquired on an BD LSR II flow cytometer (Becton Dickinson)                                                                                                                                        |
| Software                  | Data were acquired using the built-in software on the BD LSR II flow cytometry instrument and analyzed using FlowJo v10 (FlowJo, LLC, Ashling OR).                                                          |
| Cell population abundance | Monocyte purity was regularly determined by flow cytometry (FSC/SSC plus staining for CD14 surface expression) throughout the study, and strictly confirmed to be >95% for example, for microarray studies. |
| Gating strategy           | All gating strategies are included in the manuscript where necessary.                                                                                                                                       |

- Tick this box to confirm that a figure exemplifying the gating strategy is provided in the Supplementary Information.
